# Supplementary material
Source: PubMed Central journal article supplement (PMC4124828)
Supplement: NIHMS609335-supplement-SI.pdf [file NIHMS609335-supplement-SI.pdf]

**Figure S1: Effect of 13-197 on the viability of normal B (nB) cells:** Twenty thousand nB cells of a healthy donor were cultured in RF-10 media containing 1, 2, 5, 10, 20, 50 and 100  $\mu\text{M}$  13-197 in 96-well plates for 24 and 48 hours. MTT assay was used to determine the cell viability in control and treated cells. The values represent the means  $\pm$  SD from four wells of 96-well plates.

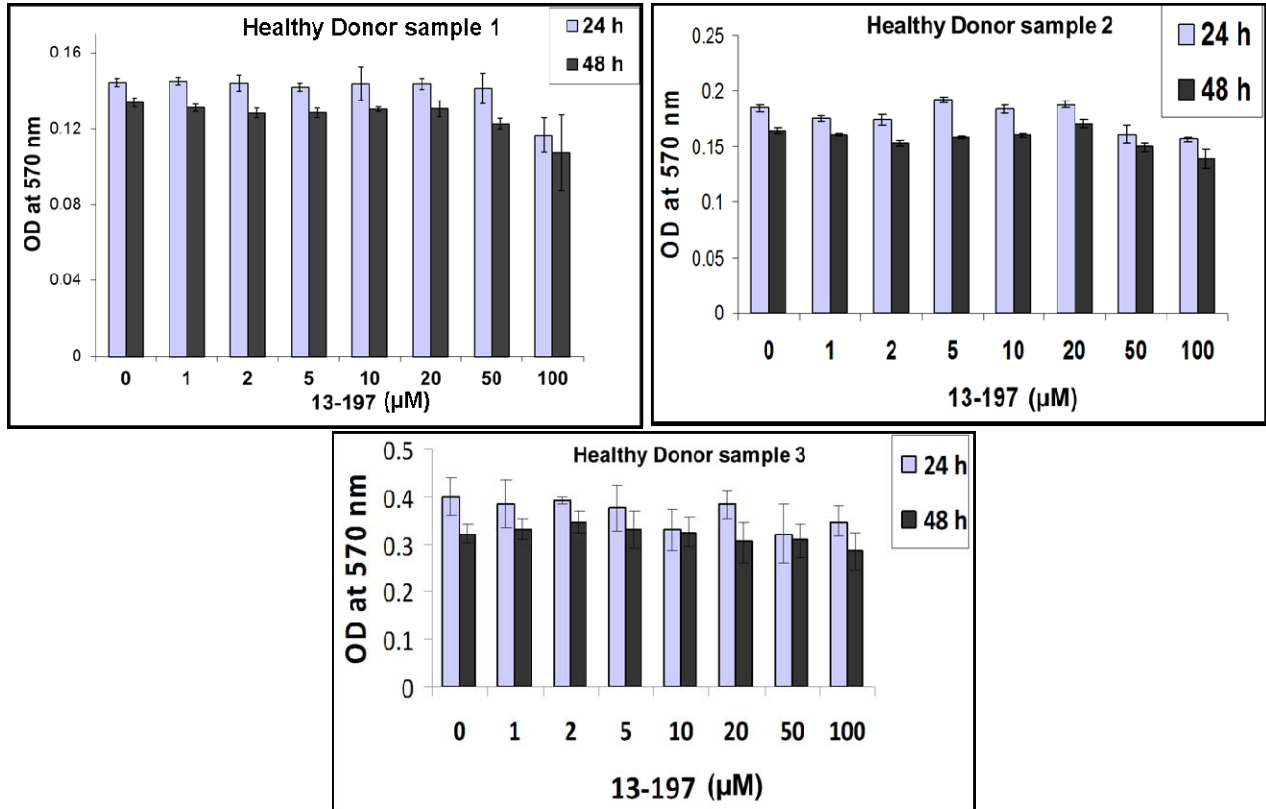

**Figure S2: Constitutive activation of NF- $\kappa$ B and mTOR pathway in different MCL cells:**

Western blot results showing constitutive activation of NF- $\kappa$ B and mTOR signaling molecules in therapy-resistant MCL cell lines as well as in a MCL patient sample compared to normal B (nB) cells from a healthy donor. PARP and  $\alpha$ -tubulin were used to confirm cytoplasmic and nuclear fractionation of proteins.  $\beta$ -actin was used as an internal control in these experiments.

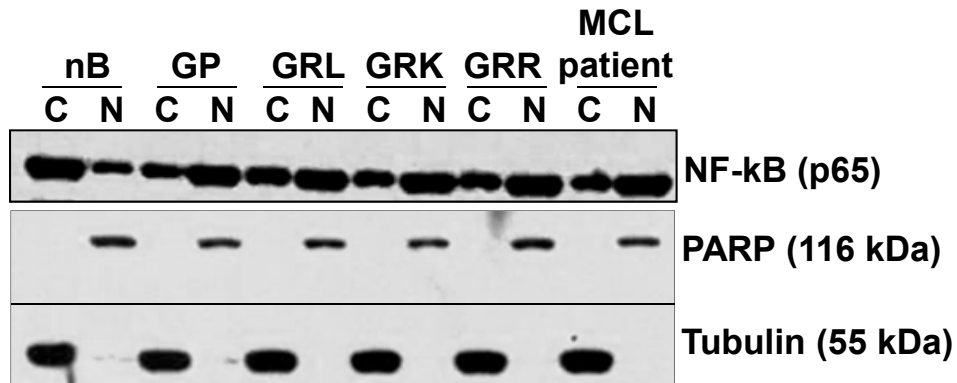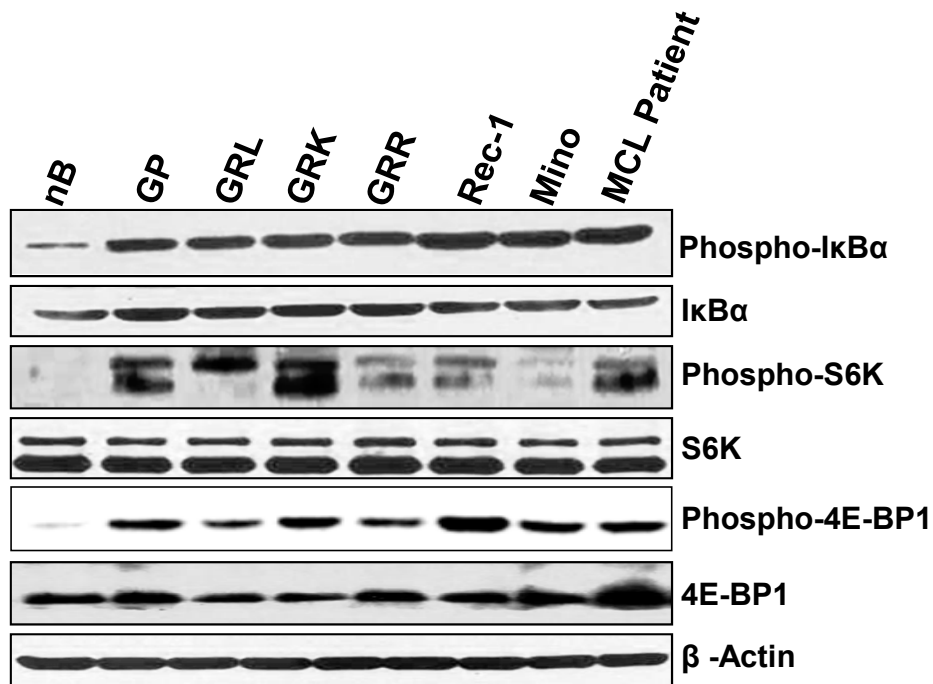

**Figure S3: Effect of 13-197 on the activation of mTOR pathway molecules:** Western blot results showing the decreased levels of activated mTOR pathway molecules (phosphorylated S6K and 4E-BP1) following 6 hours 13-197 treatment in parental GP and therapy-resistant GRL MCL cells. Total S6K and 4E-BP1, and  $\beta$ -actin were used as internal controls in this experiment.

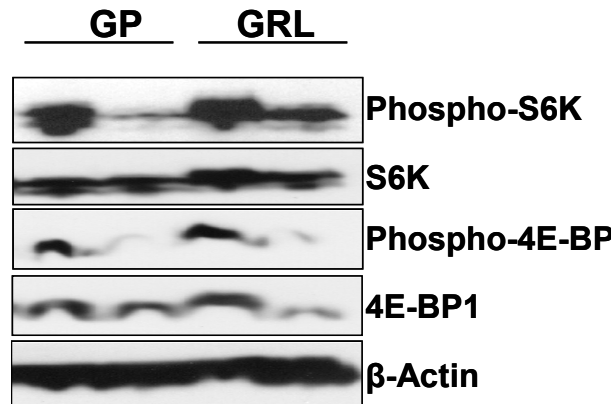

**Table S1: IC<sub>50</sub> of 13-197 in different MCL cell lines:**

| <b>MCL Cell Line</b> | <b>24 h (μM)</b> | <b>48 h (μM)</b> | <b>72 h (μM)</b> |
|----------------------|------------------|------------------|------------------|
| GP                   | <b>16.84</b>     | <b>10.41</b>     | <b>7.9</b>       |
| GRL                  | <b>19.24</b>     | <b>15.1</b>      | <b>8.9</b>       |
| GRK                  | <b>17.79</b>     | <b>11.09</b>     | <b>9.2</b>       |
| GRR                  | <b>18.32</b>     | <b>11.15</b>     | <b>7.8</b>       |
| Rec-1                |                  | <b>2</b>         |                  |
| Mino                 |                  | <b>1</b>         |                  |
| MCL primary          |                  | <b>14</b>        |                  |

IC<sub>50</sub> of 13-197 was calculated by non-linear regression analysis using Graph Pad Prism software version 5.0.
